# Supplementary material for: The Burden of COPD Morbidity Attributable to the Interaction between Ambient Air Pollution and Temperature in Chengdu, China
Source: MDPI journal article supplement (doi:10.3390/ijerph15030492), 2018-03-11
Supplement: s1 [file s1]

# Supplemental Materials: The Burden of COPD Morbidity Attributable to the Interaction between Ambient Air Pollution and Temperature in Chengdu, China

Hang Qiu, Kun Tan, Feiyu Long, Liya Wang, Haiyan Yu, Ren Deng, Hu Long, Yanlong Zhang and Jingping Pan

**Table S1.** GCV score in different cut-off points of temperature ranging from 5th and 95th to 25th and 75th percentiles in interactive model.

| Model                      | GCV scores |          |          |                 |                 |
|----------------------------|------------|----------|----------|-----------------|-----------------|
|                            | Tem_P5     | Tem_P10  | Tem_P15  | Tem_P20         | Tem_P25         |
| PM <sub>2.5</sub> (lag 06) | 3.180382   | 3.209705 | 3.129714 | 3.128002        | <b>3.126682</b> |
| PM <sub>10</sub> (lag 05)  | 3.194187   | 3.222229 | 3.145043 | <b>3.143943</b> | 3.153561        |
| SO <sub>2</sub> (lag 05)   | 3.27661    | 3.288076 | 3.174095 | <b>3.167676</b> | 3.189079        |
| NO <sub>2</sub> (lag 05)   | 3.262214   | 3.278444 | 3.185947 | <b>3.164945</b> | 3.186649        |
| CO (lag 05)                | 3.200159   | 3.214341 | 3.112365 | <b>3.108569</b> | 3.118869        |

The cut-off points are 5th and 95th for Tem\_P5, 10th and 90th for Tem\_P10, 15th and 85th for Tem\_P15, 20th and 80th for Tem\_P20, 25th and 75th percentiles for Tem\_P25. Bolded figures are the lowest GCV scores in each pollutant model, when using different cut-off points.

**Table S2.** Spearman's correlations between the different pollutants and meteorological variables.

|                   | PM <sub>2.5</sub> | SO <sub>2</sub> | PM <sub>10</sub> | CO    | NO <sub>2</sub> | O <sub>3</sub> | Tem    | RH     |
|-------------------|-------------------|-----------------|------------------|-------|-----------------|----------------|--------|--------|
| PM <sub>2.5</sub> | 1                 | 0.62*           | 0.97*            | 0.79* | 0.79*           | -0.21*         | -0.42* | -0.04  |
| SO <sub>2</sub>   |                   | 1               | 0.66*            | 0.51* | 0.65*           | -0.07          | -0.11* | -0.16* |
| PM <sub>10</sub>  |                   |                 | 1                | 0.75* | 0.81*           | -0.18*         | -0.40* | -0.11  |
| CO                |                   |                 |                  | 1     | 0.71*           | -0.31*         | -0.44* | 0.07*  |
| NO <sub>2</sub>   |                   |                 |                  |       | 1               | -0.11          | -0.23* | -0.08  |
| O <sub>3</sub>    |                   |                 |                  |       |                 | 1              | 0.74*  | -0.52* |
| Tem               |                   |                 |                  |       |                 |                | 1      | -0.1   |
| RH                |                   |                 |                  |       |                 |                |        | 1      |

\*  $p < 0.05$ ; Tem: temperature; RH: relative humidity.

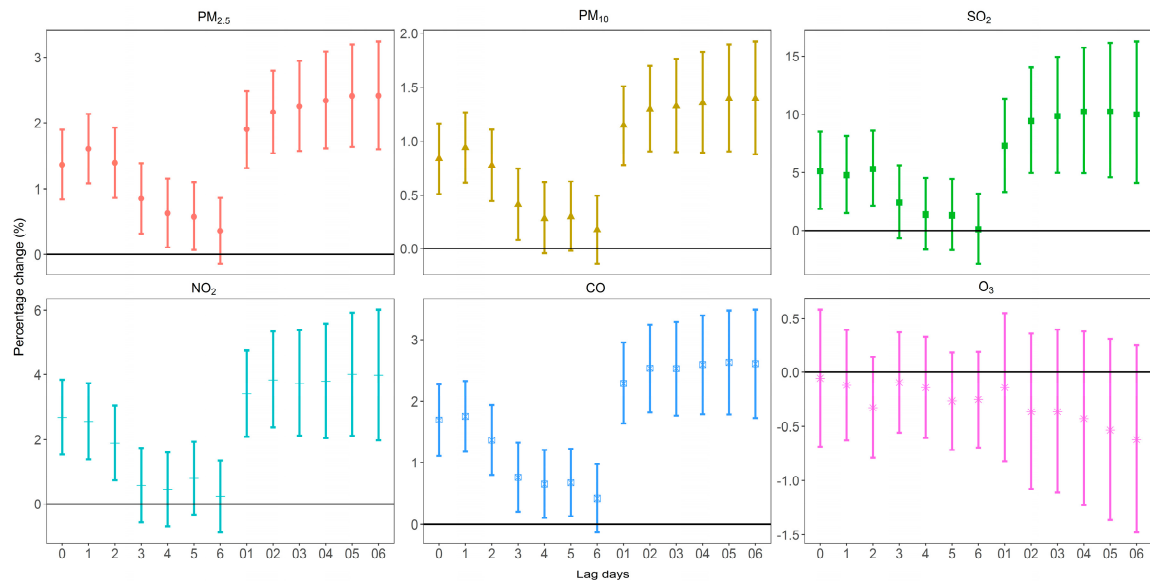

**Figure S1.** Percentage changes with 95% confidence interval in daily COPD admissions associated with air pollutants concentrations with different lag days in single-pollutant models. The percentage change in daily COPD admissions per 10 $\mu$ g/m<sup>3</sup> increase in air pollutants, except for CO per 0.1mg/m<sup>3</sup>.

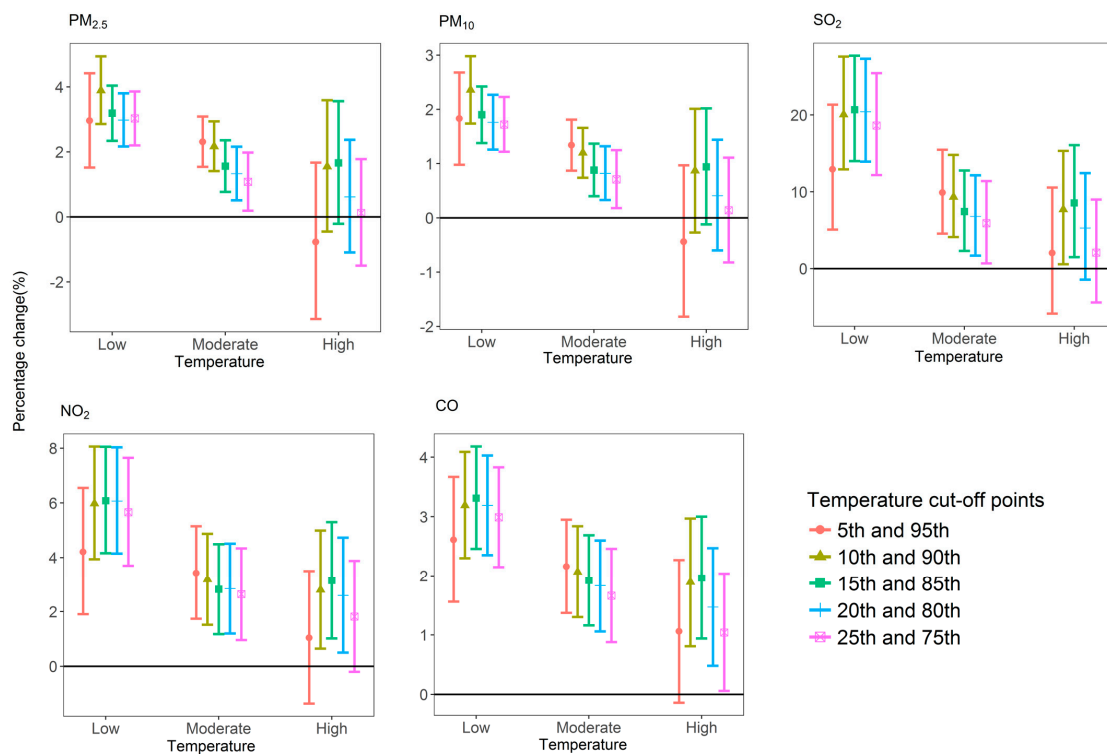

**Figure S2.** Associations between daily air pollutant concentrations and COPD HAs stratified by varying percentiles of temperature (lag 03) cut-off points.

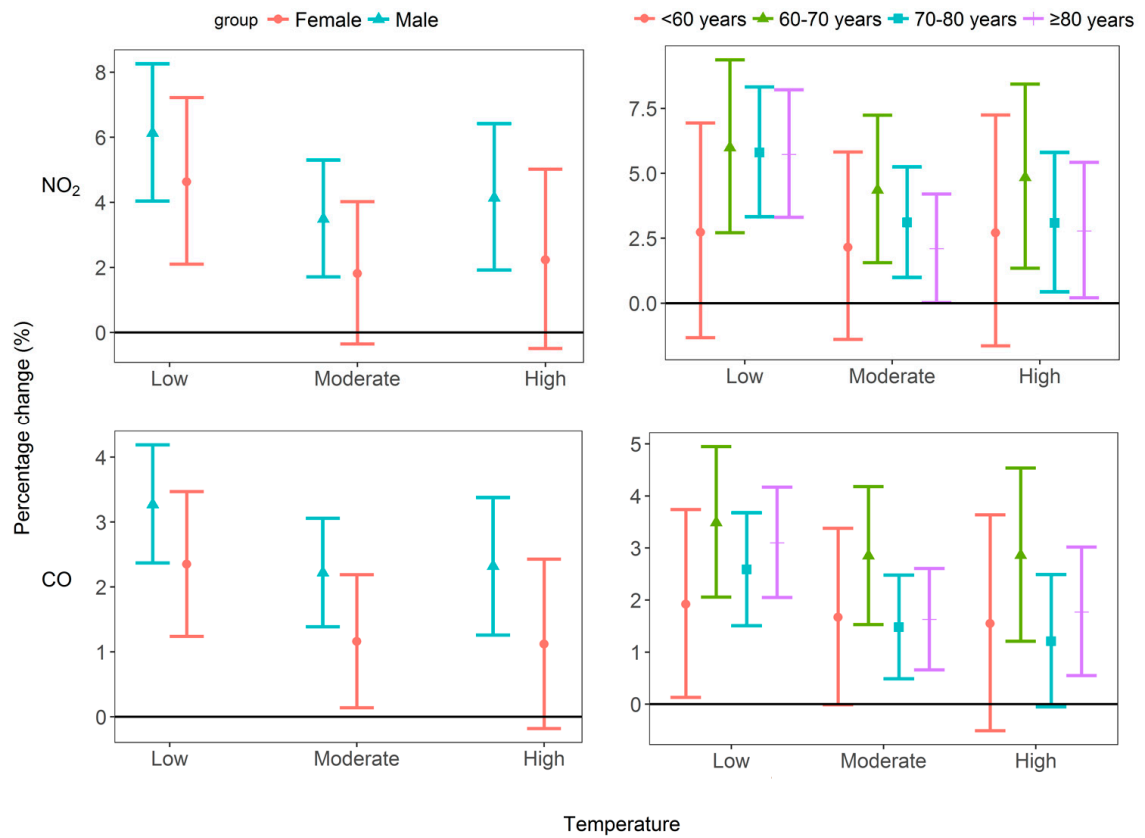

**Figure S3.** Associations between CO/NO<sub>2</sub> concentrations and daily COPD HAs in low, moderate and high temperature strata by age and gender.
